# Supplementary material
Source: MDPI journal article supplement (https://www.mdpi.com/2075-4701/12/11/1795)
Supplement: s1 [file s1]

**Supplementary Table S1.** Reference doses (RfD) in (mg kg<sup>-1</sup>day<sup>-1</sup>) for the different toxic metals

| Metals | RfD <sub>ing</sub>    | RfD <sub>dermal</sub> | RfD <sub>inh</sub>    | References |
|--------|-----------------------|-----------------------|-----------------------|------------|
| As     | 3.00×10 <sup>-4</sup> | 3.00×10 <sup>-4</sup> | 3.00×10 <sup>-4</sup> | [1]        |
| Cd     | 5.00×10 <sup>-4</sup> | 5.00×10 <sup>-4</sup> | 5.70×10 <sup>-5</sup> | [1]        |
| Cr     | 3.00×10 <sup>-3</sup> | -                     | 3.00×10 <sup>-5</sup> | [2]        |
| Hg     | 3.00×10 <sup>-4</sup> | 3.00×10 <sup>-4</sup> | 8.60×10 <sup>-5</sup> | [2]        |
| Pb     | 3.60×10 <sup>-3</sup> | -                     | -                     | [3]        |

## References

- [1] US EPA (1991) United State Environmental Protection Agency. Human Health Evaluation Manual, Supplemental Guidance: Standard Default Exposure Factors; USEPA: Washington, DC, USA, 1991.
- [2] US EPA (2011) (Exposure factors handbook 2011 edition (Final); <http://cfpub.epa.gov/ncea/risk/recordisplay.cfm?deid,236252>
- [3] Luo XS, Ding J, Xu B (2012) Incorporating bioaccessibility into human health risk assessments of heavy metals in urban park soils. Sci Total Environ 424:88–96
